1 **Managing COVID-19 in an Australian designated**  
2 **isolation facility: Implications for current and future**  
3 **healthcare crises**

4  
5 Helen M Achat<sup>1\*</sup>, Rakhi Mittal<sup>1</sup>, Joanne M Stubbs<sup>1</sup>, Nicky Gilroy<sup>2,3</sup>, Suzanne K Schindeler<sup>1#</sup>,  
6 Ramon Z Shaban<sup>2,3,4,5</sup>, Thomas Solano<sup>6</sup>

7  
8 <sup>1</sup> Epidemiology and Health Analytics, REN, Western Sydney Local Health District. Gungurra  
9 Building, No 68, Locked Bag 7118, Parramatta BC, NSW, Australia

10 <sup>2</sup>Marie Bashir Institute for Infectious Diseases and Biosecurity, University of Sydney,  
11 Camperdown, NSW, Australia.

12 <sup>3</sup> Division of Infectious Diseases and Sexual Health, Westmead Hospital and Western Sydney  
13 Local Health District, Westmead. NSW, Australia.

14 <sup>4</sup> New South Wales Biocontainment Centre, Western Sydney Local Health District and New  
15 South Wales Health, NSW, Australia.

16 <sup>5</sup> Faculty of Medicine and Health, Susan Wakil School of Nursing and Midwifery, University  
17 of Sydney. Camperdown. NSW, Australia.

18 <sup>6</sup> Critical Care, Westmead Hospital, Western Sydney Local Health District, Westmead. NSW,  
19 Australia.

20 #System Information and Analytics, NSW Ministry of Health, 1 Reserve Rd St Leonards NSW

21 **\*Corresponding author:**

22 E-mail: [Helen.Achat@health.nsw.gov.au](mailto:Helen.Achat@health.nsw.gov.au) (HA)

23

## 24 **Abstract**

25

26 Health care workers' (HCWs) lived experiences and perceptions of the pandemic can prove  
27 to be a valuable resource in the face of a seemingly persistent Novel coronavirus disease  
28 2019 (COVID-19) – to inform ongoing efforts, as well as identify components essential to a  
29 crisis preparedness plan and the issues pertinent to supporting relevant, immediate change.  
30 We employed a phenomenological approach and, using purposive sampling, conducted 39  
31 semi-structured interviews with senior healthcare professionals who were employed at a  
32 designated COVID-19 facility in New South Wales (NSW), Australia during the height of the  
33 pandemic in 2020. Participants comprised administrators, heads of department and senior  
34 clinicians. We obtained these HCWs' (i) perspectives of their lived experience on what was  
35 done well and what could have been done differently and (ii) recommendations on actions for  
36 current and future crisis response. Four themes encapsulated respondents' insights that should  
37 inform our capacity to meet current needs, direct meaningful and in situ change, and prepare  
38 us for future crises. Respondents' observations and recommendations are informative for  
39 decision-makers tasked with mobilising an efficacious approach to the next health crisis and,  
40 in the interim, would aid the governance of a more robust workforce to effect high quality  
41 patient care in a safe environment.

## 42 **Introduction**

43

44 Novel coronavirus disease 2019 (COVID-19) provided irrefutable evidence that the world is  
45 unprepared for outbreaks. Actionable plans were noticeably wanting in March 2020 when the  
46 World Health Organization (WHO) declared a global pandemic. COVID-19's rapid spread  
47 has challenged entire health care systems globally to meet the requirements of patient care  
48 while simultaneously protecting their health care workers (HCWs). As with previous  
49 outbreaks such as Severe acute respiratory syndrome (SARS) and Middle East respiratory  
50 syndrome coronavirus (MERS-CoV), HCWs have been facing extraordinary demands related  
51 to high risks of infection, stigmatisation, understaffing and uncertainties about the virus.[1, 2]  
52 Acknowledgment that their health and safety is crucial – for workers themselves, the  
53 continuing and safe care of their patients, and control of outbreaks,[3] – has not manifested  
54 into concrete measures that minimise HCWs' risk of mental health issues,[4-6] infection and  
55 death from COVID-19.[7]

56 Nearing 24 months since WHO's declaration, countries worldwide continue to struggle with  
57 adequate reliable health care in the face of the pandemic.[8, 9] Pandemic-distinct challenges,  
58 known but some elusive to overcoming, include matters related to adequate supply and  
59 effective use of personal protective equipment (PPE),[10, 11] the safety and well-being of an  
60 appropriately skilled health workforce,[3, 12, 13] workplace structures, practices and policies  
61 that shape the experiences and capabilities of HCWs[14, 15] and an overarching adaptable  
62 decision making and management approach.[16, 17]

63 Australia, with a population of around 25 million, experienced low infection and death rates  
64 compared to most OECD countries prior to the Omicron COVID-19 variant, which resulted  
65 in exponential rise in new cases and a notable increase in deaths.[18] Its relative success till  
66 late 2021, attributed in part to its structural advantage as an island nation able to close its

67 boarders[19] and strong collaboration among experts, by no means spared HCWs and the  
68 public from the aforementioned challenges in early 2020. As all countries come to terms with  
69 a seemingly inevitable ‘COVID normal’ state of operations, the lived experience and  
70 perceptions of HCWs who held senior clinical and administrative positions during the  
71 pandemic can prove to be a valuable resource. Frontline responders’ unique insights into  
72 health care delivery can enable discernment of aspects of health care and its coordination that  
73 have been efficiently addressed, areas that prove to be ongoing challenges, as well as reasons  
74 for the situations encountered. Explicating the lessons learnt should galvanise decision  
75 makers to meet current needs and identify issues relevant to a preparedness plan for future  
76 crises.

77 The aim of this study is to document, through the garnering of lived experiences and  
78 perceptions, Australian HCWs’ considerations on what they view as intrinsic to effective  
79 health care measures for a successful pandemic response, and in so doing identify those  
80 aspects of health care that should be sustained or adapted going forward. This study focuses  
81 on HCWs, non-clinical and clinical, from a designated COVID-19 facility in New South  
82 Wales (NSW), Australia.

## 83 **Materials and Methods**

84

### 85 **Study design**

86

87 This qualitative study was conducted using a phenomenological approach through individual  
88 semi-structured in-depth interviews. Addressing the study questions “What could have been  
89 done, or done differently to better respond to the pandemic?” and “What would you like to  
90 see maintained as we move towards a ‘COVID-19 normal’ phase?”, researchers aimed to  
91 describe staff’s perspective of changes in their lived experience at the height of the pandemic

92 in 2020 and their recommendations on actions that could facilitate their workplace's  
93 response to COVID-19 and preparedness for future health crises.

## 94 **Procedure**

95  
96 In-depth, semi-structured individual interviews were conducted in person or via online video  
97 (Zoom), according to the participant's choice. The interviewers were three of the co-authors  
98 all of whom were female and qualified and experienced public health professions.

99 Participants were asked a preliminary question about their roles prior to and subsequently  
100 during the height of the pandemic, which enabled confirmation of their involvement in the  
101 hospital's pandemic response. The interviewer then loosely followed a script that supported  
102 in-depth discussion of respondents' lived experiences and perceptions on the subjects of staff  
103 stress and anxiety, changes in workplace policies and procedures, communication methods,  
104 challenges, areas for improvement and recommendations for healthcare response and  
105 preparedness. The interviewer used probing questions to gain more in-depth responses and  
106 aid clarification. All interviews were recorded with the interviewees' consent.

## 107 **Participants and setting**

108  
109 All participants worked at a large tertiary teaching hospital that is a designated COVID-19  
110 management facility in NSW, Australia, which received confirmed COVID-19 patients from  
111 late January 2020. We employed purposive and snowball sampling (see Table 1 for a  
112 description of the professional groups), which was supported by the Director of Infectious  
113 Diseases and Prevention and the Clinical Nurse Consultant and lead of Infection Control at  
114 the hospital. They each compiled a list of potential key informants comprising hospital staff  
115 employed during the height of the COVID-19 pandemic. Each key informant was sent a letter  
116 of introduction with details of the study and the contact details of the Principal Investigator.  
117 Subsequent communication by telephone and email confirmed consent to participate in a

118 semi-structured interview with an expected duration of approximately 45 minutes and an  
 119 interview appointment.

120 Table 1. Characteristics of participants (N=39)

| <b>Participant characteristics</b>              | <b>N (&gt;2)</b> | <b>%</b> |
|-------------------------------------------------|------------------|----------|
| <b><i>Gender</i></b>                            |                  |          |
| Male                                            | 19               | 48.7     |
| Female                                          | 20               | 51.3     |
| <b><i>Department</i></b>                        |                  |          |
| Emergency                                       | 4                | 10.0     |
| COVID ward/clinic                               | 4                | 10.0     |
| Infectious control and prevention               | 4                | 10.0     |
| Executives                                      | 4                | 10.0     |
| Intensive Care Unit                             | 3                | 7.7      |
| Bio-preparedness                                | 3                | 7.7      |
| †Anesthetics                                    | <3               |          |
| †Radiology                                      | <3               |          |
| †Oral health                                    | <3               | 43.5     |
| †Geriatrics                                     | <3               |          |
| †Infectious disease                             | <3               |          |
| †Respiratory and sleep medicine                 | <3               |          |
| †Hospital in the Home (HITH)                    | <3               |          |
| †Obstetrics                                     | <3               |          |
| †Procurement                                    | <3               |          |
| †Education innovation and technology            | <3               |          |
| †Nursing, midwifery and allied health education | <3               |          |
| <b><i>Position</i></b>                          |                  |          |
| Nurse (NUM, CNC, Educators, RN)                 | 15               | 38       |
| Doctors (HoD, Deputy HoD, Staff Specialist)     | 18               | 46       |
| Senior management                               | 4                | 10       |

|               |  |  |
|---------------|--|--|
| Radiographers |  |  |
|---------------|--|--|

121 Note: †denotes less than 3 participants; number not reported to maintain confidentiality

122

## 123 **Data analysis**

124

125 Interview audio-recordings were imported into a commercial program that produced a rough  
126 transcription. The interviewer cleaned the initial transcript by assigning speakers to the script  
127 and correcting text and punctuation.

128 Data were analysed using Colaizzi's distinctive seven step process [20] that provides a  
129 rigorous analysis, with each step staying close to the data, which includes familiarisation,  
130 identifying significant statements, formulating meanings, clustering themes, developing an  
131 exhaustive description, producing the fundamental structure and seeking verification of the  
132 fundamental structure. Researchers engaged in ongoing analyses. Transcripts were analysed  
133 by at least two researchers using a standard template, before discussions with the wider  
134 research team about emerging themes to inform the focus of subsequent interviews.

135 Following the transcription of the first few interviews, a review of the completed templates  
136 by research team members confirmed persistent themes. The team was responsive and open  
137 to what was in the data and allowed it to guide an iterative approach to analysis. Researchers  
138 analysed the transcripts independently by bracketing data on preconceived ideas and strictly  
139 following the Colaizzi method described above. Early analysis allowed the initial  
140 development of a coding framework that underwent ongoing development as transcripts were  
141 re-read and reviewed. Researchers reviewed emerging findings at regular team meetings until  
142 data saturation occurred and used consensus to resolve disagreements.

143 A key to reading the quotes is provided below:

144 1) [ ] indicates the researcher has added the narrative to make the context and/or meaning  
145 clearer, or replaced some identifiable text with de-identifiable text.

146 2) ... means that words, phrases or sentences of the interview have been deleted to make the  
147 context and/or meaning clearer.

148 3) ( ) after each original participant quote indicates that particular participant's numerical  
149 pseudonym.

## 150 **Rigor/trustworthiness**

151

152 The criteria of credibility, dependability and conformability [21] were used to confirm the  
153 rigor of the findings. Following the transcription of the first few interviews, a peer review  
154 process was used by the research team members to confirm persistent themes. We adhered to  
155 all assumptions and strategies of the qualitatively driven designs. We were responsive and  
156 open to what was in the data and allowed the data to guide our iterative approach to analysis.  
157 We reviewed emerging findings during daily team meetings to ensure data saturation and  
158 consensus among study team members. This was done to ensure the credibility of research.

## 159 **Ethical considerations**

160

161 This study was approved by Western Sydney Local Health District Ethics Committee  
162 (2020/ETH01674). All participants received information about the study, and a consent form,  
163 which they were asked to read, sign and return. They were made aware that they could refuse  
164 to answer any question and could terminate the interview at any time. Our study adhered to  
165 standard ethical processes for qualitative research to ensure the anonymity of participants and  
166 confidentiality of the data.

167

168



## 169 **Results**

170

### 171 **A description of participants and interviews**

172

173 Thirty-nine interviews were conducted via Zoom (N=35) and face-to-face (N=4). All  
174 participants were employed in roles with a primary focus on the provision of health care in  
175 the height of the pandemic. We obtained over-representation from the emergency department  
176 (ED), intensive care unit (ICU), respiratory medicine and infectious diseases (ID)  
177 departments including the COVID clinic and ward, which were deemed high exposure  
178 environments. Twenty were in newly created roles working either on the COVID-19 ward or  
179 in another capacity (Table 1). Interviews had a duration of 30 to 104 minutes, averaging 60  
180 minutes and were conducted from November 2020 to February 2021.

181

### 182 **Key considerations for an effective response**

183

184 The unknown characteristics of the virus, initially amplified by a plethora of information  
185 from local and international sources, were a cause of heightened anxiety and stress. HCWs  
186 were acutely affected by a number of factors, among them the potential shortage of and  
187 education about PPE use, a tremendous COVID-19 related workload, leave cancellations, and  
188 moral dilemmas around the provision of less-than-optimal care and the social isolation of  
189 patients. The initial absence of guidelines and anticipated directives from the Ministry of  
190 Health stymied the process of informed decision-making. Participants had a range of  
191 experiences of and considerations about measures undertaken or lacking to address safe  
192 health care delivery.

193

194 Four themes encapsulated respondents' lived experiences and reflections on what was done  
195 well, what could have been done differently, and considerations for ongoing and future  
196 provision of health care (Figure 1): minimising the spread of disease at all times, maintaining  
197 a sense of collegiality and promoting informed decision-making, maintaining a plan for future  
198 crises and promoting corporate and clinical agility. We have mentioned selected quotations  
199 throughout the Results and have presented detailed quotations in Table 2.  
200 (Fig 1: COVID-19 – Insights gained and recommendations for change)

Figure 1: COVID-19 – Insights gained and recommendations for change

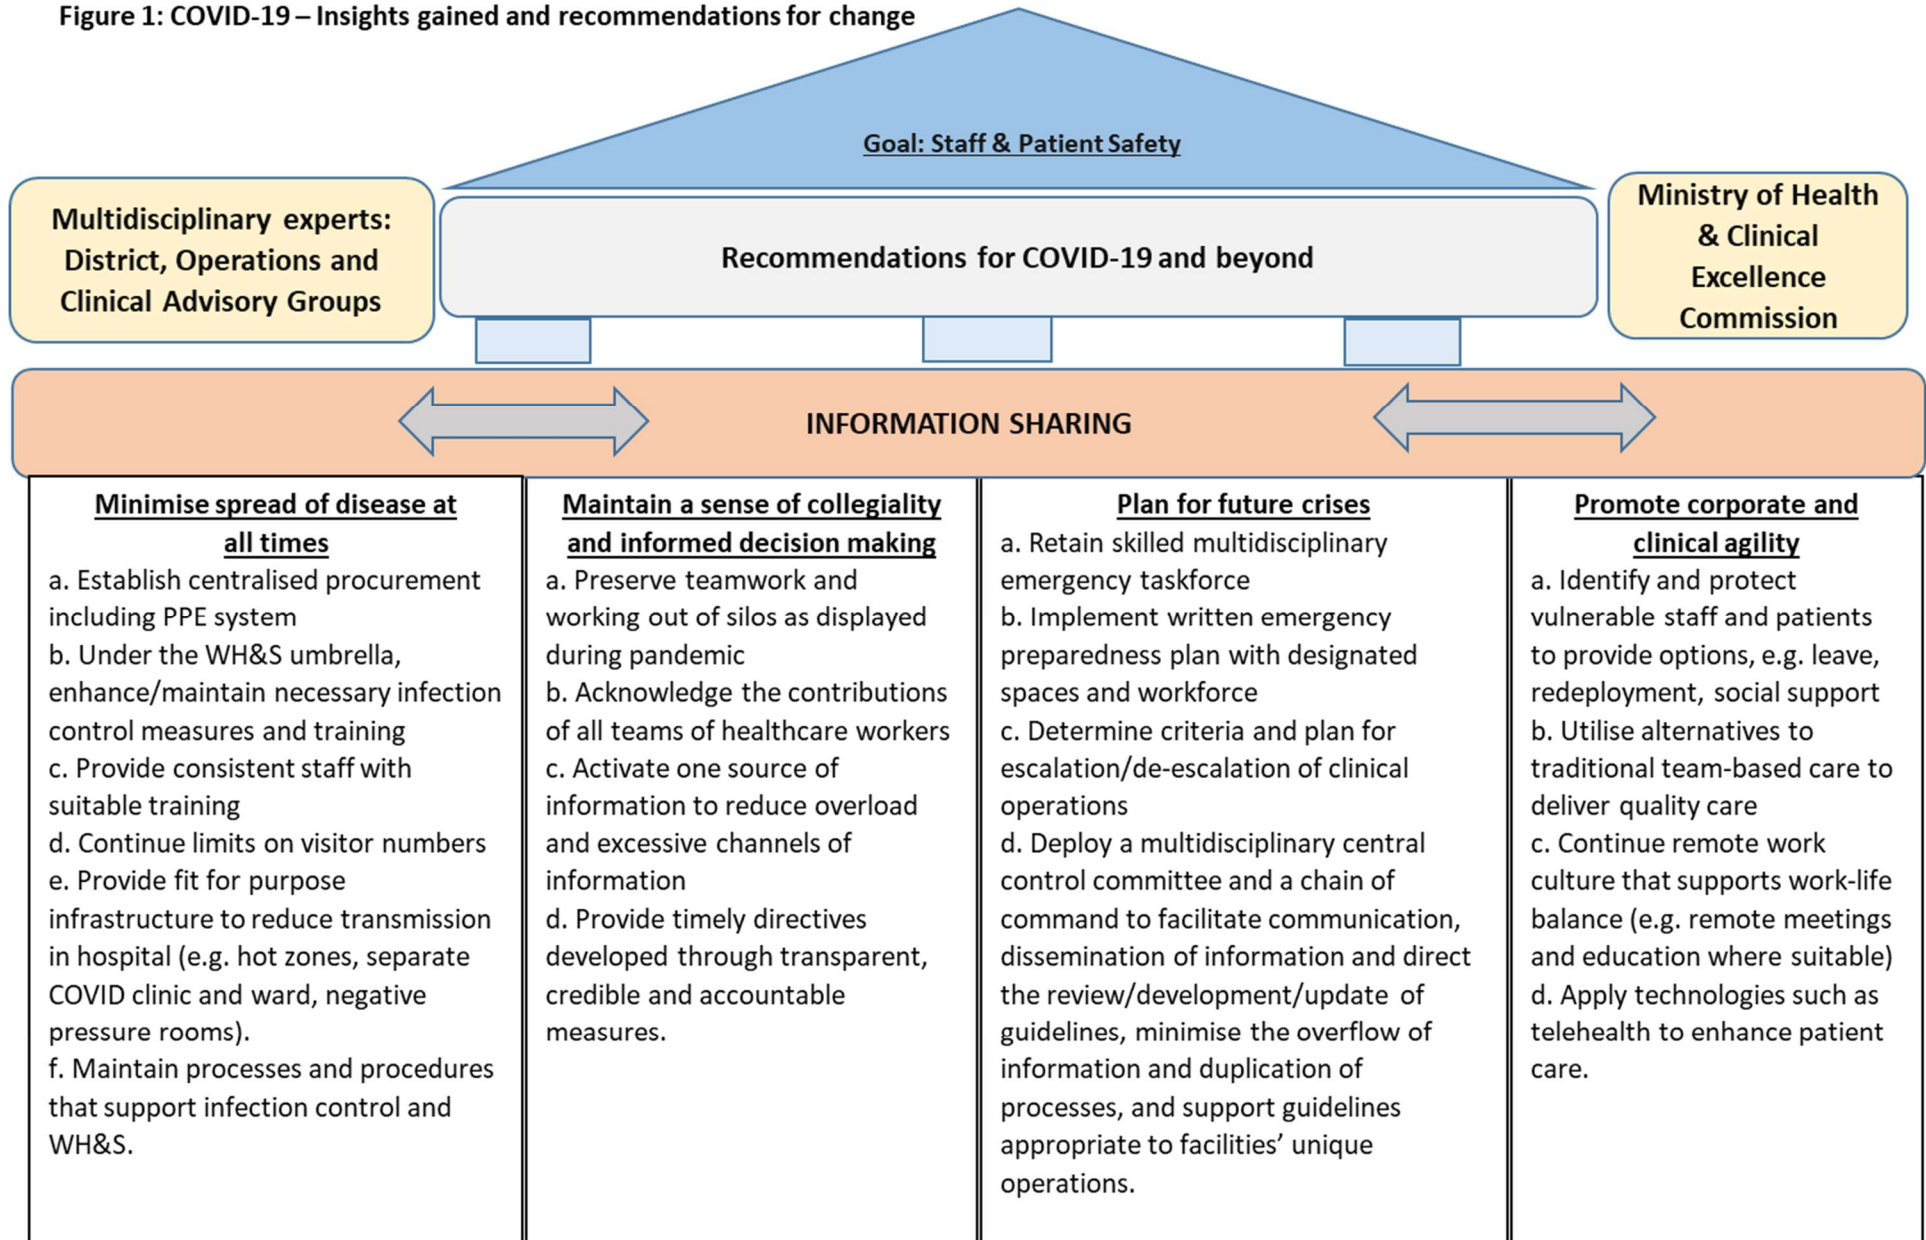

Table 2. Detailed quotes categorised by themes

| Theme                                                                                          | Illustrative quotes                                                                                                                                                                                                                                                                                                                                                                                                                                                                                                                                                                                                                                                                                                                                                                                                                                      |
|------------------------------------------------------------------------------------------------|----------------------------------------------------------------------------------------------------------------------------------------------------------------------------------------------------------------------------------------------------------------------------------------------------------------------------------------------------------------------------------------------------------------------------------------------------------------------------------------------------------------------------------------------------------------------------------------------------------------------------------------------------------------------------------------------------------------------------------------------------------------------------------------------------------------------------------------------------------|
| <b>Theme 1. Minimise the spread of disease at all times</b>                                    |                                                                                                                                                                                                                                                                                                                                                                                                                                                                                                                                                                                                                                                                                                                                                                                                                                                          |
| a. Centralised and managed product procurement including PPE.                                  | <i>If we had a CELP [centralised equipment loan pool], or a centralised thing, if someone was in charge of maintaining that, we wouldn't have expired stock. (P02)</i>                                                                                                                                                                                                                                                                                                                                                                                                                                                                                                                                                                                                                                                                                   |
| b. Under the WH&S umbrella, enhance/maintain necessary infection control measures and training | <p data-bbox="801 403 2083 507"><i>I don't think I've ever seen better hand hygiene in the hospital, wiping surfaces down, making sure that we're always keeping things clean and tidy, respiratory etiquette, coughing into the elbow, it's a really nice thing ... (P27)</i></p> <p data-bbox="801 552 2083 687"><i>We made some substantial changes to clinical practice around here over that time that, going forward, you'd like to see maintained ... we have all these protocols and procedures now... In the event of something else like this, we have to be careful we don't lose them, because they're all done and they all work ... a greater awareness by staff on PPE use, and what's most effective with that. I think that's been really good. (P11)</i></p>                                                                           |
| c. Provide consistent staff with suitable training                                             | <p data-bbox="801 703 2083 762"><i>They could have given me permanent staff in both areas, instead of this constant fight for staff and constant education and constant training. (P14)</i></p> <p data-bbox="801 807 2083 991"><i>One of the hardest things from the very start, I felt, from a frontline staff health perspective, is ... they had to staff it [the COVID ward] with in-house pool staff, or agency staff ... And we've obviously learned as time has gone on that was not a good thing, because there was hardly any continuity of staff on each shift. There was no person put in charge of that ward [initially] ... They desperately needed somebody on that ward to pull them together ... (P36)</i></p>                                                                                                                          |
| d. Continue limits on visitor numbers                                                          | <i>The change in visiting policy was [something] everyone struggled with very much, even me. ... When the visiting changed, the visiting policy was absolutely zero visitors. Especially when you had dying COVID patients – that was really challenging. A lot of staff were quite traumatized by that ... We had, how many deaths? ... In one family the wife was allowed in for half an hour, and in the other one [the patient] died alone. So that is ... very hard for the nurses to accept. Well, everyone really ... this is really against all our practices, our morals, our values. That was hard to swallow, but I guess it's the greater good, for the greater amount of people and it's to protect everyone. But ... when you're so entrenched in your morals, values and how death should look, that was very hard to overcome. (P22)</i> |

|                                                                                                                                                        |                                                                                                                                                                                                                                                                                                                                                                                                                                                                                                                                                                                                                                                                                                                                                                                                                                          |
|--------------------------------------------------------------------------------------------------------------------------------------------------------|------------------------------------------------------------------------------------------------------------------------------------------------------------------------------------------------------------------------------------------------------------------------------------------------------------------------------------------------------------------------------------------------------------------------------------------------------------------------------------------------------------------------------------------------------------------------------------------------------------------------------------------------------------------------------------------------------------------------------------------------------------------------------------------------------------------------------------------|
|                                                                                                                                                        | <i>Keeping the visitor [numbers] small, because ... unless there's a few special circumstances ... generally, most people only need one person with them, or two max, and probably actually need to have a rest because they are sick. So just keeping numbers low, we'll probably continue that. (P04)</i>                                                                                                                                                                                                                                                                                                                                                                                                                                                                                                                              |
| e. Provide fit for purpose infrastructure to reduce transmission in hospital (e.g. hot zones, separate COVID clinic and ward, negative pressure rooms) | <p><i>I think the built physical environment is very critical. Just due to the nature of our work and the potential for airborne transmission. (P13)</i></p> <p><i>You need to understand better how to manage these airborne transmissible diseases in a hospital setting, and do it effectively all the time, not just because the pandemic has come around ... it just makes no sense to me anymore to be 'cohorting' infectious patients together. (P11)</i></p> <p><i>So, we had to then reconfigure the emergency department and build a negative flow room. And then, how do you treat patients in these rooms? How do you communicate with them? How do you communicate with the staff? And how do you respond, doing your straightforward work, such as giving morphine, for example. That was a huge, huge task. (P34)</i></p> |
| f. Maintain processes and procedures that support infection control and WH&S                                                                           | <i>Some good stuff came out of it [the pandemic]. We've learnt how to make special circuits for NIV for the infection-prone ... NIV circuits that had expiratory valves on them, so that you could filter the air that was coming out. And that was quite big, because you have to change the whole circuit setup. There was a lot of work done by a few people to figure out how to have these safer circuits that we could use if we needed to ... Stopping use of nebulizers, better controlled use of oxygen or high-flow oxygen, those were all important things. (P11)</i>                                                                                                                                                                                                                                                         |
| <b>Theme 2. Maintain a sense of collegiality and informed decision-making</b>                                                                          |                                                                                                                                                                                                                                                                                                                                                                                                                                                                                                                                                                                                                                                                                                                                                                                                                                          |
| a. Preserve teamwork and working out of silos as displayed during pandemic                                                                             | <p><i>It was a great response in the end and I think everybody was happy to knuckle down and put in what was going to be required, recognising that it might involve a lot of extra work and time to deal with this problem if it gets out of control ... a sense of 'well, that's what our job would be'. (P11)</i></p> <p><i>I think in a pandemic ... as a hospital you come together, everyone's got one agenda ... so you pulled together as a team, and that really occurred; everyone put aside their [own] agenda. (P24)</i></p> <p><i>[We] have an intensive care department and emergency department and anaesthetics department who all talk to each other now. It's actually changed communication. (P21)</i></p>                                                                                                            |
| b. Acknowledge the contributions of all teams of healthcare workers                                                                                    | <i>For us, it was important to acknowledge staff for their work and effort, and it was an eye-opener how some people responded, and how much value they added. (P31)</i>                                                                                                                                                                                                                                                                                                                                                                                                                                                                                                                                                                                                                                                                 |

|                                                                                                       |                                                                                                                                                                                                                                                                                                                                                                                                                                                                                                                                                                                                                                                                                                                                                                                                                                                                                                                                                                                                                                                                                                                                                                                                                                                                                                                                                                                                                                                                                                                                                                                                                                                                                                                                                                                                                                                                                         |
|-------------------------------------------------------------------------------------------------------|-----------------------------------------------------------------------------------------------------------------------------------------------------------------------------------------------------------------------------------------------------------------------------------------------------------------------------------------------------------------------------------------------------------------------------------------------------------------------------------------------------------------------------------------------------------------------------------------------------------------------------------------------------------------------------------------------------------------------------------------------------------------------------------------------------------------------------------------------------------------------------------------------------------------------------------------------------------------------------------------------------------------------------------------------------------------------------------------------------------------------------------------------------------------------------------------------------------------------------------------------------------------------------------------------------------------------------------------------------------------------------------------------------------------------------------------------------------------------------------------------------------------------------------------------------------------------------------------------------------------------------------------------------------------------------------------------------------------------------------------------------------------------------------------------------------------------------------------------------------------------------------------|
|                                                                                                       | <p><i>Now we're coming down to a normal period. I think it's also a time that staff can sort of receive that word of appreciation, that gesture of appreciation. (P09)</i></p>                                                                                                                                                                                                                                                                                                                                                                                                                                                                                                                                                                                                                                                                                                                                                                                                                                                                                                                                                                                                                                                                                                                                                                                                                                                                                                                                                                                                                                                                                                                                                                                                                                                                                                          |
| <p>c. Activate one source of information to reduce overload and excessive channels of information</p> | <p><i>There's communication, and how you get communication to every tier of your organisation in a way that's consistent. The messaging has to be consistent ... that is very important. We have what we hear on the TV, what we hear at a national level, what we hear at a jurisdictional level, what we hear at the hospital executive level then what we hear at an interdisciplinary meeting level. And I think one size does not fit all. I think one of the things we realized is that you have to take all that information and communication and adapt it to your local context. I think that's been very challenging ... (P10)</i></p> <p><i>I really struggled with the communications. It would have been good to have a dedicated staff member in the ICU that was doing nothing more than channelling and filtering and then sending out the information that my staff require. The amount of time that we all spent looking at the same emails, trying to figure out what was new, what was relevant, what was important ... it would have been really good to have a dedicated staff member doing that ... integrating information across all of those clinical groups at the coalface that was almost a full-time job for an army of people ... that was done by clinicians. (P23)</i></p> <p><i>If we just had one source of truth, I think it would be less confusing for people. (P10)</i></p> <p><i>There were issues with the use of different types of masks — P2, N95, normal masks. And because there's different information coming from the Ministry, different information coming from the CEC [Clinical Excellence Commission] that was always lagging behind ... we almost felt that we were several steps ahead of the CEC, because CEC has to come up with a policy based on consensus ... Yes, there was confusion, come to think of it. (P31)</i></p> |
| <p>d. Provide timely directives developed through transparent, credible and accountable measures</p>  | <p><i>I don't know where they got that evidence from. And, you know, that wasn't communicated to us. A lot of these policies were ... instigated overnight. And we just had to ... implement them, with little or no consultation. (P22)</i></p> <p><i>Should have had some open forums or Skype forums where people could ask questions, because, while I knew what was going on, and the medical and ED knew, a lot of other people not in COVID wards didn't have a good grasp of what was going on. (P15)</i></p>                                                                                                                                                                                                                                                                                                                                                                                                                                                                                                                                                                                                                                                                                                                                                                                                                                                                                                                                                                                                                                                                                                                                                                                                                                                                                                                                                                   |

|                                                                                                                                                                                                                                                                                                                                          |                                                                                                                                                                                                                                                                                                                                                                                                                                                                                                                                                                                                                                                                                                                                                                                                        |
|------------------------------------------------------------------------------------------------------------------------------------------------------------------------------------------------------------------------------------------------------------------------------------------------------------------------------------------|--------------------------------------------------------------------------------------------------------------------------------------------------------------------------------------------------------------------------------------------------------------------------------------------------------------------------------------------------------------------------------------------------------------------------------------------------------------------------------------------------------------------------------------------------------------------------------------------------------------------------------------------------------------------------------------------------------------------------------------------------------------------------------------------------------|
|                                                                                                                                                                                                                                                                                                                                          | <i>So ... we called for hospital Q&amp;A sessions ... they have an ID consultant in there ... and then at the end, it's [open for] questions. Just to assure the staff that this is happening, this is how we're going to deal with it. We're going to make sure that you guys are protected as a health care provider. (P32)</i>                                                                                                                                                                                                                                                                                                                                                                                                                                                                      |
| <b>Theme 3. Plan for future crises</b>                                                                                                                                                                                                                                                                                                   |                                                                                                                                                                                                                                                                                                                                                                                                                                                                                                                                                                                                                                                                                                                                                                                                        |
| a. Retain skilled multidisciplinary emergency taskforce                                                                                                                                                                                                                                                                                  | <i>There was a lot of confusion [not having enough staff] initially. A lot of anxiety and it slowed down workflow a lot. (P07)</i>                                                                                                                                                                                                                                                                                                                                                                                                                                                                                                                                                                                                                                                                     |
| b. Implement written emergency preparedness plan with designated spaces and workforce                                                                                                                                                                                                                                                    | <i>I think preparedness is probably the biggest challenge. You never know what's around the corner. But to have contingencies in place, and to have a strategy that is not necessarily a tailored strategy, but it's a strategy that can act as a formula for a ready-to-go. (P13)</i><br><br><i>And when you have an evolving environment and COVID as well, it creates a lot of extra stress and uncertainty. When staff come to work not knowing whether maybe in two weeks' time we might move from this place and move to somewhere else again. (P09)</i>                                                                                                                                                                                                                                         |
| c. Determine criteria and plan for escalation/de-escalation of clinical operations                                                                                                                                                                                                                                                       | <i>[Staff] have been rundown and then what we're going to do is, as soon as things ease, we're going to ramp surgery back up, which I felt was a bit of an issue. ... We could have stepped surgery back up in a clean, more controlled way. ... I think the most frustrating thing is ... there was no formal process of escalation. (P02)</i><br><br><i>We could have done [some preparation] prior to this pandemic, to some degree of how we would shut down services in a staged approach, where the priorities for staffing would be, activating flexible work plans, all that sort of thing. (P13)</i>                                                                                                                                                                                          |
| d. Deploy a multidisciplinary central control committee and a chain of command to facilitate communication, dissemination of information, and direct the review/development/update of guidelines, minimise the overflow of information and duplication of processes, and support guidelines appropriate to facilities' unique operations | <i>I still don't know what the hierarchy is, I report to all these different people. (P01)</i><br><br><i>There is a risk assessment, what level we're on at the moment ... at one stage, there's four levels to the risk assessment risk matrix that was developed here at [Hospital 2]. And then the CEC brought out a risk matrix with only three levels, and they didn't align. So we were often sitting on that line between green and amber. (P03)</i><br><br><i>Investigations are generally delayed ... It was such an ordeal to clean all the machines that would investigate them, certain services wouldn't even investigate the patients until they were [COVID] negative. And so, a lot of the time ... they weren't being investigated properly, they weren't being examined properly</i> |

|                                                                                                                     |                                                                                                                                                                                                                                                                                                                                                                                                                                                                                                                                                                                                                                                                                                                                                                                                                                                                                                                                                                                                                                                                                         |
|---------------------------------------------------------------------------------------------------------------------|-----------------------------------------------------------------------------------------------------------------------------------------------------------------------------------------------------------------------------------------------------------------------------------------------------------------------------------------------------------------------------------------------------------------------------------------------------------------------------------------------------------------------------------------------------------------------------------------------------------------------------------------------------------------------------------------------------------------------------------------------------------------------------------------------------------------------------------------------------------------------------------------------------------------------------------------------------------------------------------------------------------------------------------------------------------------------------------------|
|                                                                                                                     | <i>... They go to fuel inpatient stay times ... other investigations ... unnecessary treatment ... huge follow-on effects. ... You just go for days ... until the swab came back negative ... definitely delayed their scans by 12 to 24 hours depending on the swab time. (P07)</i>                                                                                                                                                                                                                                                                                                                                                                                                                                                                                                                                                                                                                                                                                                                                                                                                    |
| <b>Theme 4. Promote corporate and clinical agility</b>                                                              |                                                                                                                                                                                                                                                                                                                                                                                                                                                                                                                                                                                                                                                                                                                                                                                                                                                                                                                                                                                                                                                                                         |
| a. Identify and protect vulnerable staff and patients to provide options, e.g. leave, redeployment, social support  | <i>There are actually a lot of vulnerable healthcare workers around everywhere. For example, in my department, either older age, or some chronic disease, but they still work in the front line. I think they need to know, because of their risk, there's still a system in place for them. For example, if we need to relocate them to work in a lower-risk environment... (P09)</i>                                                                                                                                                                                                                                                                                                                                                                                                                                                                                                                                                                                                                                                                                                  |
| b. Utilise alternatives to traditional team-based care to deliver quality care                                      | <i>Their [Registrars'] regular training practices, their training clinics, their procedural lists were all thrown out the door with the ward-based system. I think one of the problems that we faced was that we felt that this ward-based system was thrust upon us. And even though there was limited consultation, I don't think there was any major consideration of the significant disadvantages of this system. ... It was a real black and white, all or nothing approach where we transition to immediate ward-based care or normal team-based care. ... We probably need to have a better consideration of how to stage our transition ... without going from one to the other extreme immediately. (P30)</i><br><br><i>"It [ward-based care] decreased the movement, but also made the patients in the ward a doctor's responsibility. So it led to earlier detection of problems and greater communication between the nursing staff and the medical staff, who knew what their patterns of communications were. So the doctors were more immediately available." (P06)</i> |
| c. Continue remote work culture that supports work-life balance (e.g. remote meetings and education where suitable) | <i>If we run a big departmental meeting, we can also invite other specialities to join and they just log in. That's it. You know, attendance is amazing, CPD [continuing professional development] will be amazing for 2020. ... The attendance at our departmental meetings is quite high because it's all Zoom ... virtual meetings are easy to log on to. So, again, it's easier to invite other specialities. (P21)</i>                                                                                                                                                                                                                                                                                                                                                                                                                                                                                                                                                                                                                                                             |
| d. Apply technologies such as telehealth to enhance patient care where applicable                                   | <i>A lot of patients prefer ... telehealth because it's a big deal for some of our more frail or less mobile patients to get to the hospital, find parking, wait for their outpatient appointment, pick up their script. (P29)</i><br><br><i>It cost money to give them VPN [virtual private network] access, but we just went 'You know what, if you need to be able to see your patient records from home to be able to do your job and keep yourself safe [that works]'. (P29)</i>                                                                                                                                                                                                                                                                                                                                                                                                                                                                                                                                                                                                   |



204

205 **Theme 1. Minimise the spread of disease at all times**

206 Combatting the COVID-19 pandemic requires caring for patients who contract the virus,  
207 while adopting infection control policies and procedures to protect the healthcare  
208 professionals who are enabling and administering care.

209 1(a) At the centre of staff concerns was the potential unavailability of PPE and uncertainties  
210 about the appropriate type and use of masks.

211 *The contention around the mask ... seemed to cause a lot of anxiety. (P11)*

212 The introduction of a centralised and managed PPE stock addressed multiple problems  
213 including staff stockpiling on wards, expired stock and escalating demands on the clinical  
214 product personnel to meet individual needs.

215 *...and I think that [centralisation] worked well. You just made sure that you got what you needed for the week.*  
216 *(P14)*

217 1(b) The pandemic resulted in some participants advocating for aspects of infection control to  
218 be accommodated alongside Work Health & Safety (WH&S) practices that would keep staff  
219 and their patients safe year-round.

220 *When it comes to keeping staff safe, you need to have a WH&S mindset, not an infection control mindset ...*  
221 *Infection control relies on behaviours ... WHS has a much more precautionary approach; it develops systems*  
222 *that, in my view, stop people from making mistakes. (P06)*

223 Conscious of the importance of PPE, staff demands for training/refresher sessions in donning  
224 and doffing created heavy workloads for nurse educators and led to innovations to address  
225 demands. Personnel were needed to organise the extensive implementation, including venues  
226 and schedules.

227 *Part of infection control is education ... [through] Grand Rounds [also]... on-the-spot PPE training on the*  
228 *ward. Anyone new coming on had to have a competency [assessment] done, ... a lot of education [occurred]*  
229 *with individual departments, like radiology, the cleaners, ICU ... (P36)*

230 1(c) Equipping the COVID ward with a permanent nurse unit manager and staff eliminated  
231 the daily task of training nurses from a temporary pool, and reduced time pressures on  
232 clinicians as well as the anxiety of patients whose questions previously went unanswered at  
233 best. Permanent staffing fostered teamwork and increased competency, valued in a highly  
234 stressful environment.

235 *And so, you train someone up, and they'll be gone the next day, you train someone else up, and they'll be gone*  
236 *the next day ... The patients they were helping would ask them questions, and they wouldn't know the answers.*  
237 *Sometimes they just make answers up. And that's when the shortcuts get made ... (P01)*

238 1(d) The social isolation of patients who were already experiencing limited physical contact  
239 was distressing for all involved. Staff described the moral dilemma as they struggled to abide  
240 by the 'no visitor' policy, particularly for patients who were at the end of their life.  
241 Acknowledging the unnatural caring situation, equipment and technology facilitated patient  
242 contact with family and loved ones. Staff struggled with, but appreciated, the need to limit  
243 visitor numbers.

244 *Things like reducing visitor [numbers] and not allowing visitors ... [entailed] big negotiation in the COVID*  
245 *ward. We were very firm about a lot of that stuff, no visitors, minimal people. (P03)*

246 1(e) Suitable physical infrastructure necessary for isolation such as reconstructing physical  
247 space to establish 'hot zones' for patients undergoing COVID testing was lacking initially.  
248 Challenges staff experienced in attempting to provide usual care included concerns about  
249 airborne transmission, the sanitising of equipment and staff's restricted capacity while  
250 donned in full PPE.

251 *It's important that there are certain designated isolated areas for the different wards [for] patients who*  
252 *develop any symptoms which might be suspicious ... cleaning equipment for the scanners if they need*  
253 *imaging, and the right workflows to ensure ... imaging if needed. Having the right spaces to keep the patient*

254        *so that clinicians and nursing staff feel comfortable treating them and reviewing them, examining them and*  
255        *providing plans and updates in person. (P07)*

256        1 (f) Throughout the pandemic, minimising the risk of airborne transmission has been a  
257        priority. Risky procedures such as the use of nebulisers and non-invasive ventilation were  
258        stopped, and alternative or new procedures were introduced.

259        *Simple things, like the use of PPE, avoiding nebulisers, the process of intubating people, ...non-invasive*  
260        *ventilation [NIV] have changed forever. The processes of cohorting people and risk stratifying at triage,*  
261        *that's something that's going to change forever. A lot of practice has changed ... those changes will be*  
262        *permanent. (P31)*

263        **Theme 2. Maintain a sense of collegiality and promote informed decision-**  
264        **making**

265        Effective management enabling a quick pace of change across the facility, most  
266        consequential during the initial uncertainties such as virus-host interaction and length of  
267        period of transmissibility, was dependent on the leadership of and collaboration among staff  
268        and fit-for-purpose communication methods, channels and communicators. The majority of  
269        participants, including the Heads of Departments, spoke passionately about frequent and  
270        productive inter-department and department-executive interactions that permitted ‘on-tap’  
271        problem solving for the continuation of a range of routine services employing innovative  
272        approaches. A critical facilitator was the creation of three hierarchical committees, one of  
273        which was the Clinical Expert Advisory Group (CEAG), which met as frequently as the  
274        situation required, daily or more often, and continues to meet more than a year and a half on  
275        from its inception.

276        2(a) Leadership and the teamwork it supported were essential for timely decision-making  
277        and the continuation of health care delivery during the pandemic.

278 *The strength of our response has been the camaraderie and goodwill between clinical services. ...teams*  
279 *have really pulled together wonderfully well. Never had any pushback about COVID and who's taking what*  
280 *responsibility. I think everyone stepped up remarkably. (P10)*

281 Leadership and strong collaboration evident in the CEAG meetings were widely  
282 acknowledged and enabled timely solutions and directives to address critical issues.

283 *I think maintaining some of those meetings, where there is a broad input from clinicians to executives in an*  
284 *open format, would be helpful. (P06)*

285 2(b) The pandemic placed urgent and extensive demands on staff, the majority of whom  
286 stepped up to the challenges. A recurring theme was unscheduled work hours with  
287 demanding workloads. Unsurprising were calls for acknowledgement of outstanding  
288 contributions of staff.

289 *I feel like there's a lot of unsung heroes. (P12)*

290 2(c) Information overload from numerous local and international sources, and traditional and  
291 social media, often exacerbated staff anxiety and created an onerous task for those  
292 responsible for policies and guidelines. Conflicting information, for example about the  
293 appropriate type of and circumstances for wearing a mask, was challenging for most.

294 *We had WHO guidance, we had advice from the federal government, from the AHPPC [Australian Health*  
295 *Protection Principal Committee], from the Ministry [of Health], who had advice from the Community of*  
296 *Practice. So much advice, so many documents being drafted and redrafted and redrafted. (P18)*

297 Managers had a burdensome task to justify the reason for inconsistent policies across the state  
298 and among Local Health Districts (LHDs). The consequence was heightened fears that  
299 inhibited optimum health care and, in some circumstances, led to deficient patient care.

300 *I think we were really challenged because the different LHDs did things differently. And some people who*  
301 *worked both, say, here and the LHD2, would come back from LHD2 going, 'Oh, they're doing this?' And I*  
302 *[would say] 'Well, you know, we are very clear that we will do....' I think that was really challenging,*  
303 *having variation between LHDs. So I think at a state level that should be done differently. (P29)*

304 2(d) Transparency, credibility and accountability of timely directives were noticeably absent.  
305 The initial lack of identified channel(s) of trusted information resulted in misinformation,  
306 anxiety and inconsistent practices. Participants voiced concern about operational decision-  
307 making that sometimes lacked input from staff at the coalface.

308 *One of the things that was potentially lacking was transparency with what was happening at the state level,*  
309 *or within the Ministry of Health level, that appeared to be almost like a black box. (P06)*

310 Missing from state directives was an appreciation that health facilities were not equal  
311 pandemic responders and therefore directives needed to be specific and detailed..

312 *They did have an intensivist from [Hospital1], who was part of the advisory group ... But [Hospital1] really*  
313 *didn't have much direct input into the day-to-day management of COVID. It was really [Hospital2]*  
314 *managing that...there was a lack of input of [Hospital2] within the Ministry's decision-making, representing*  
315 *essential intensive care. (P06)*

316 Timely dissemination of information via the Chief Executive's Broadcasts to all HCWs gave  
317 credibility to the rapidly changing workplace requirements. Open forums such as Q&As and  
318 Grand Rounds were valued because they allowed staff to seek answers and have further  
319 clarity. Some departments also employed additional mechanisms to keep staff informed.

320 *I think the communication was a way of relieving staff anxiety ...the Chief Executive's daily broadcast was*  
321 *quite helpful ... Grand Rounds initially was very effective. The Infectious Diseases team was so articulate,*  
322 *and they gave such measured responses, and gave people the information that they needed. (P03)*

### 323 **Theme 3: Plan for future crises**

324 The ambiguity surrounding appropriate procedures and directives for the provision of care in  
325 a safe environment fuelled feelings of stress and anxiety. Participants described the benefits  
326 of a multidisciplinary team armed with the expertise, experience and resources capable of  
327 providing an immediate response and ongoing governance and capacity for the wide-ranging  
328 components integral to a comprehensive pandemic response.

329 3(a) COVID-19 demanded an urgent review of usual health care activities. Delays were  
330 counterproductive to efforts to keep staff engaged. A taskforce that could be activated at a  
331 moment's notice would minimise delays, staff anxiety and the accompanying risks to staff and  
332 patient well-being.

333 *Having an emergency taskforce at the hospital where, say, if anything like this happened—Ebola, some sort*  
334 *of pandemic, a fire—you have ten designated nurses that you would pull out of different departments ... a*  
335 *mobilised taskforce with consistent nurses ... all ready from different wards that had already been*  
336 *designated. ... And these are the [taskforce] doctors. (P01)*

337 3(b) A pandemic plan detailing components for a comprehensive response would minimise  
338 delays and uncertainties. Details would support a proactive response and identify designated  
339 spaces appropriate for isolating and caring for suspected or infected patients.

340 *We should have had a pandemic plan. We have for influenza; we've had these plans ... at an executive level*  
341 *probably sitting on a shelf somewhere.... But it's not just about having a document as to how you do these*  
342 *things ... we've learned ...we were doing things very reactively. But now, part of our mandate with the*  
343 *biocontainment centre is that we're going to be thinking very proactively about pandemic planning, and at*  
344 *every level... (P10)*

345 3(c) The criteria and a plan for modifications to clinical operations, including escalation and  
346 de-escalation of procedures, would enable staff to be prepared and act in unison.

347 *We probably need to have a better consideration of how to stage our transition from a team-based or ward-*  
348 *based system without going from one to the other extreme immediately. (P30)*

349 3(d) Clarity around roles, responsibilities and lines of reporting were blurred or absent during  
350 the height of the pandemic, deleterious to patient care and staff well-being. Long hours were  
351 spent developing solutions for working at the coalface that were superseded by less fit-for-  
352 purpose directives from higher levels of the health sector. A multidisciplinary central control  
353 committee could efficiently create expert groups with the authority and responsibility to  
354 action urgent and ongoing change.

355 *I think there has been a very strong case for us to have some sort of strong national, multidisciplinary*  
356 *communicable disease centre, where you incorporate all the leaders from these various groups into one*  
357 *entity that could then share their information and make sure that all the information that they're sharing*  
358 *with their groups is consistent. (P10)*

#### 359 **Theme 4: Promote corporate and clinical agility**

360 Staff and patient safety and well-being are paramount concerns for any health system.

361 Circumstances during the pandemic fashioned unique responses to the provision of health  
362 care and staff's ways of working.

363 4(a) Individual staff/patient characteristics and needs were foremost in the minds of those  
364 determining the day-to-day operations in the facility. Staff's age, personal circumstances and  
365 physical and mental status were key considerations in determining their vulnerability, and  
366 simultaneously, their capacity to contribute to the facility's pandemic response. Similarly,  
367 confidence in staff enabled flexibility in caring and advocating for patients.

368 *The majority of the time [visiting rules] were followed. There were a few exceptions, though, where families*  
369 *did try and do their own thing.... The hospital staff did the best they could under the circumstances....*  
370 *Sometimes it's not possible though, especially if you have someone who's very sick or dying ... that's the*  
371 *hardest bit. (P16)*

372 4(b) Perspectives on adopting a ward-based model of care, while diverse, were predominantly  
373 positive. Concerns were voiced about staff in training achieving required competencies and the  
374 immediacy with which the model was introduced. Conversely, the medical staff were more  
375 easily accessible and shifts that accompanied the ward-based care minimised un-rostered and  
376 overtime schedules.

377 *Changes from the medical staff model to your ward-based group, they should try and hang on to that, but*  
378 *that's going to take some investment of resources. ... That really made a difference. ... But that's completely*  
379 *changing the delivery of medical care.... (P20)*

380 4(c) Technology offered the organisation an avenue to sustain aspects of workplace  
381 requirements, as staff could remotely attend meetings, engage in educational sessions, review  
382 medical notes and communicate with patients. The remote work culture was welcomed by  
383 most, despite its sudden and widespread application.

384 *It was a significant cultural shift for the entire organisation to realise that you don't need to physically be in*  
385 *the building to be able to contribute. There's a role for physically walking around and seeing the lie of the*  
386 *land. But there are also certain advantages, not spending hours travelling to and from an office ... you can*  
387 *be equally productive in this sort of setting. (P06)*

388 4(d) Technologies such as telehealth to enhance patient care were welcomed by most  
389 clinicians, with some advocating for continued or greater use. Telehealth supported self-  
390 isolation, reducing risk of exposure and spread of COVID-19. Senior clinical staff touted the  
391 value of a permanent virtual ED.

392 *I've found telehealth really useful. I do everything by telehealth now. (P17)*

393 *I think telehealth could have been done better, to be honest. I think we could have had [a] virtual emergency*  
394 *department for patients who were suffering conditions where they needed to see a doctor ... to be in an*  
395 *emergency department, but they couldn't because of COVID. ... And then they could have had a more*  
396 *planned approach. (P34)*

397 For certain conditions, such as those requiring a physical examination or patient observation,  
398 telehealth was deemed unsuitable.

399 *We decided that there were very few visits that we could cut out, or that we could move to video. ...we*  
400 *needed to keep doing most of these visits as face to face visits, because to do otherwise was going to*  
401 *potentially make things unsafe. (P38)*

402

403



## 404 **Discussion**

405

406 Australia's consistent easing of restrictions from late 2020 signalled the opportune time to  
407 capture the lived experiences and perspectives of staff that could inform improvements to  
408 quality health care now and into the future. We aimed to identify successes to inform facets  
409 of health care that should be maintained, and at the same time, document into corporate  
410 memory aspects that should be modified if not entirely avoided. Our findings focus on the  
411 well-being of HCWs and patients, and aspects of governance and management of a tertiary  
412 hospital.

### 413 **Considerations for ongoing and future provision of health care**

#### 414 **Minimise risk of infection**

415

416 Health care organisations around the world are reassessing how to safely provide essential  
417 care for patients in times of crisis.[22] The pandemic elevated the importance of staff safety  
418 and prevention of transmission to the community comparable to patient safety.[23, 24]  
419 Heightened anxiety – stemming from the unknowns of the virus,[3] inconsistent guidelines,  
420 and inadequate PPE stocks and directives – was not unique to Australia.[25] Sudden and  
421 extensive demands for training stretched the resources of Infection Control and nurse  
422 educators. Establishment of a centralised managed stock enabled transparency and ready  
423 access, thereby reducing individual hoarding and stockpiling.

424 The utmost priority given to infection control positively affected WH&S aspects of the  
425 healthcare system. Posited as the way forward, infection control practices could be effectively  
426 incorporated into routine activities if perceived as a WH&S issue, a concept previously  
427 reported.[26] One such example, initiated by the ED, saw staff assigned designated  
428 workstations and computers and required to declutter and regularly clean surfaces to reduce

429 contamination and sources of infection. Restricting visits, employed as an early infection  
430 control strategy, caused moral injury,[27] particularly for staff unable to apply their  
431 professional judgement. Guidelines enabling patients to safely receive visitors[28] reflect an  
432 appreciation for the benefits of visitors to patients[29] as well as the need for regulation.[30,  
433 31]

434 Efforts directed towards procedural changes and staffing may have relevance to non-  
435 pandemic operations.[32] Staff agility enabled the adoption of rapid changes, some  
436 temporary as was an innovative process for intubating patients, and others long-term such as  
437 avoidance of nebulisers, cohorting patients suffering from infectious diseases and use of  
438 suitable physical infrastructure. Work is already underway to review regulations and  
439 standards on hospital buildings and the guidelines that govern their operations.[33, 34]

440 Minimising the contact between infected and non-infected patients and staff using ‘shelter  
441 hospitals’[35] would enable non-pandemic operations to continue, thereby minimising the de-  
442 escalation of services.

443 Early designation of a separate testing clinic and ward, the latter equipped with permanent  
444 staff and a Nurse Unit Manager (NUM), would support operations, staff and patient safety,  
445 and work demands of assigned medical practitioners. Pool staff increased the likelihood of  
446 shortcuts of various procedures, unauthorised staff providing directives, PPE breaches, and  
447 anxiety and unabated fear among both poorly informed staff and patients.

#### 448 **Maintain a sense of collegiality and informed decision-making**

449

450 The general motivation of staff to be involved early in the pandemic might have stemmed  
451 from feelings of obligation in the presence of facilitators such as the provision of  
452 accommodation, and at a local level, transparent information sharing and a sense of inclusion  
453 in decision-making,[36, 37] which would have alleviated feelings of distress that were

454 common among HCWs.[38] The collaboration participants experienced, desirous across  
455 occupational and professional groups,[39] was underpinned by multipronged communication  
456 strategies between staff at the coalface and the leadership groups, and was particularly  
457 valuable in the periods of rapid change, as noted elsewhere.[40] Recounts of everyone having  
458 the same agenda were as common as those of un-rostered hours worked – both warranting  
459 recognition.

## 460 **Plan for future crises**

461  
462 Despite SARS-CoV-2 being the third coronavirus to emerge in the past 20 years and experts  
463 previous warning of impending deadly epi/pandemics,[41-43] the world was unprepared for  
464 COVID-19. In addition to ‘a detailed operational blueprint’[43] for an effective response,  
465 participants expressed the importance of the retention of a skilled multidisciplinary  
466 emergency taskforce and, for sustained analytical and operational capacities, a  
467 multidisciplinary central control group. A taskforce would prove invaluable particularly in  
468 situations when there is an extended period before the infectious agent is identified such as  
469 those presented by COVID-19, compared to the SARS outbreak when researchers quickly  
470 identified the infectious agent as SARS-CoV-1.

471 Up-to-date information, education and training are not only prerequisites for quality patient  
472 care but are important for reducing HCWs’ risk of psychological distress.[44] Integrated in  
473 the control centre, designated individuals in core response areas such as ICU[31] could  
474 establish information channels on the current status of operations that would strengthen  
475 collaboration and coordination across diverse but relevant groups. Hand-in-hand with  
476 information sharing and having what has been referred to as a *transparent strategy*,[45] is  
477 acknowledging uncertainty[46] to abate confusion and panic.

478 An effective control centre would: engage frontline staff and experts across disciplines and  
479 levels of governance[47] in decision-making and the development of evidence-based policies  
480 and protocols,[35] avoiding duplication of processes; prioritise infection control, protection  
481 and safety measures ahead of knowledge of disease transmission;[38] create central stocking  
482 and stockpiling of equipment to avoid resource strain;[48] and deploy standardised  
483 frameworks to keep all staff abreast of updated protocols, guidelines and policies.  
484 Acknowledged as a key component of a preparedness plan is a scalable emergency system  
485 capable of responding to a surge in demand for resources and patient care.[17, 49]

### 486 **Promoting corporate and clinical agility**

487  
488 Participants extolled the agility of staff as they reflected on efforts to achieve essential  
489 elements for a responsive health care environment that provides quality patient care while  
490 simultaneously mitigating the spread of the virus amid rapid and frequent change. Similarly,  
491 leaders acted swiftly to mitigate risk, introducing a ward-based model of care aimed at  
492 minimising the movement and interacting of staff at work, and offering assistance to staff  
493 identified as vulnerable – the latter a known effective measure.[50] Risk management  
494 included staff taking leave, working remotely and being redeployed. Working remotely, a  
495 practice previously considered impractical,[51] especially in health care related jobs, became  
496 a reality for many in the pandemic.[52] However, still lacking are appropriate guidelines for  
497 individual sectors[51] and assessment of its benefits.

498 Telemedicine proved effective in filling some health care gaps, enabling healthcare services  
499 to infected and non-infected people during the pandemic.[53] In our study clinicians had  
500 mixed reactions to its sustainability, citing situations when a traditional physical examination  
501 is necessary. Nonetheless, most appreciated that remote working has the potential to be cost-

502 effective, extend access to specialist care,[54] and increase productivity and job  
503 performance.[55, 56]

## 504 **Limitations**

505  
506 The present study focused on one facility that is a designated COVID-19 facility in Australia,  
507 potentially limiting its generalisability. Our purposive sampling however, captured key  
508 informants who were representative of crucial sectors of the pandemic response. They were  
509 strategically placed to identify successes and gaps in the provision of health care, and to make  
510 considered recommendations reflecting both a bird's-eye view and coalface experiences.  
511 Despite never reaching the dire situation experienced elsewhere, it can be argued that the four  
512 themes hold worldwide applicability – with a number of their sub-components identified as  
513 important considerations in studies from Europe,[35] Canada,[49] and USA[15] – and  
514 contain generic concepts with international relevance. Our methods employing Morrow's et  
515 al.[20] modification of Colaizzi's phenomenological approach were strictly adhered to and  
516 re-analysis was undertaken, culminating in results based on four researchers to minimise  
517 researcher bias.

## 518 **Conclusion**

519  
520 This study presents, to our knowledge, the first report of lived experiences and  
521 recommendations from clinical and non-clinical senior healthcare professionals in Australia.  
522 Their observations and recommendations should inform decision-makers tasked with  
523 mobilising an efficacious approach to the next health crisis and, in the interim, aid the  
524 governance of a more robust workforce to effect high quality patient care in a safe  
525 environment. Admittedly, the initial challenge rests with leaders who must agree to prioritise

526 fit-for-purpose systems and structures as part of crisis preparedness while simultaneously  
527 tackling inexorable current demands.

## 528 **Acknowledgments**

529

530 The authors would like to thank Nicole Tolhurst and Elizabeth White for their guidance in the  
531 study's approach, all participants for their time and considered responses, Peter McCaul for  
532 reviewing and providing useful feedback on manuscript drafts, and Leendert Moerkerken  
533 who identified and facilitated the transcription process.

534

## 535 **References**

536

- 537 1. Lee SM, Kang WS, Cho A-R, Kim T, Park JK. Psychological impact of the 2015 MERS outbreak  
538 on hospital workers and quarantined hemodialysis patients. *Comprehensive psychiatry*.  
539 2018;87:123-7.
- 540 2. Maunder R, Hunter J, Vincent L, Bennett J, Peladeau N, Leszcz M, et al. The immediate  
541 psychological and occupational impact of the 2003 SARS outbreak in a teaching hospital. *Cmaj*.  
542 2003;168(10):1245-51.
- 543 3. Chang D, Xu H, Rebaza A, Sharma L, Cruz CSD. Protecting health-care workers from  
544 subclinical coronavirus infection. *The Lancet Respiratory Medicine*. 2020;8(3):e13.
- 545 4. Huang JZ, Han M, Luo T, Ren A, Zhou X. Mental health survey of 230 medical staff in a  
546 tertiary infectious disease hospital for COVID-19. *Zhonghua lao dong wei sheng zhi ye bing za zhi=*  
547 *Zhonghua laodong weisheng zhiyebing zazhi= Chinese journal of industrial hygiene and occupational*  
548 *diseases*. 2020;38:E001-E.
- 549 5. Lai J, Ma S, Wang Y, Cai Z, Hu J, Wei N, et al. Factors Associated With Mental Health  
550 Outcomes Among Health Care Workers Exposed to Coronavirus Disease 2019. *JAMA Network Open*.  
551 2020;3(3):e203976-e.
- 552 6. Spoorthy MS, Pratapa SK, Mahant S. Mental health problems faced by healthcare workers  
553 due to the COVID-19 pandemic—A review. *Asian J Psychiatr*. 2020;51:102119.
- 554 7. Guillén E, Buissonnière M, Lee CT. From lionizing to protecting health care workers during  
555 and after COVID-19—systems solutions for human tragedies. *The International Journal of Health*  
556 *Planning and Management*. 2021;36(S1):20-5.
- 557 8. Buchan J, Catton H, Shaffer F. *Sustain and Retain in 2022 and Beyond: The Global Nursing*  
558 *Workforce and the COVID-19 Pandemic*. Philadelphia, USA: International Centre on Nurse Migration;  
559 2022 January 2022.
- 560 9. Ward M, Carroll L. Hospitals prepare for tripling of COVID patients amid staffing crisis. *The*  
561 *Sydney Morning Herald*. 2022 7 January 2022.
- 562 10. Mandrola J. CoViD-19 and PPE: Some of us will die because of the shortage. *Recenti Prog*  
563 *Med*. 2020;111(4):183.
- 564 11. Rowan NJ, Laffey JG. Challenges and solutions for addressing critical shortage of supply chain  
565 for personal and protective equipment (PPE) arising from Coronavirus disease (COVID19) pandemic -  
566 Case study from the Republic of Ireland. *Sci Total Environ*. 2020;725:138532.
- 567 12. Gupta N, Balcom SA, Gulliver A, Witherspoon RL. Health workforce surge capacity during the  
568 COVID-19 pandemic and other global respiratory disease outbreaks: A systematic review of health  
569 system requirements and responses. *The International Journal of Health Planning and Management*.  
570 2021;36(S1):26-41.
- 571 13. Ananda-Rajah M, Veness B, Berkovic D, Parker C, Kelly G, Ayton D. Hearing the voices of  
572 Australian healthcare workers during the COVID-19 pandemic. *BMJ Leader*. 2020:leader-2020-  
573 000386.
- 574 14. Denis JL, Cote N, Fleury C, Currie G, Spyridonidis D. Global health and innovation: A  
575 panoramic view on health human resources in the COVID-19 pandemic context. *Int J Health Plann*  
576 *Manage*. 2021;36(S1):58-70.
- 577 15. Dichter JR, Kanter RK, Dries D, Luyckx V, Lim ML, Wilgis J, et al. System-level planning,  
578 coordination, and communication: care of the critically ill and injured during pandemics and  
579 disasters: CHEST consensus statement. *Chest*. 2014;146(4 Suppl):e87S-e102S.
- 580 16. Anesi GL, Lynch Y, Evans L. A Conceptual and Adaptable Approach to Hospital Preparedness  
581 for Acute Surge Events Due to Emerging Infectious Diseases. *Crit Care Explor*. 2020;2(4):e0110.
- 582 17. Brydges R, Campbell DM, Beavers L, Nazanin Khodadoust, Iantomasi P, Sampson K, et al.  
583 Lessons learned in preparing for and responding to the early stages of the COVID-19 pandemic: one  
584 simulation's program experience adapting to the new normal. *Advances in Simulation*. 2020;v5(8).



- 585 18. Worldometer. Worldometer Coronavirus [Online data]. 2021 [updated 22 February, 2022;  
586 cited 2022. Available from: <https://www.worldometers.info/coronavirus/country/australia/>.
- 587 19. Child J, Dillon R, Erasmus E, Johnson J. Collaboration in crisis: Reflecting on Australia's  
588 COVID-19 response 2020 [Available from: [https://www.mckinsey.com/industries/public-and-social-](https://www.mckinsey.com/industries/public-and-social-sector/our-insights/collaboration-in-crisis-reflecting-on-australias-covid-19-response)  
589 [sector/our-insights/collaboration-in-crisis-reflecting-on-australias-covid-19-response](https://www.mckinsey.com/industries/public-and-social-sector/our-insights/collaboration-in-crisis-reflecting-on-australias-covid-19-response).
- 590 20. Morrow R, Rodriguez A, King N. Colaizzi's descriptive phenomenological method. *The*  
591 *Psychologist*, 28(8), 643-644] 2015;28(8):643-4.
- 592 21. Lincoln YS, Guba EG. *Naturalistic Inquiry*: Sage Publications Inc; 1985.
- 593 22. Kaye AD, Okeagu CN, Pham AD, Silva RA, Hurley JJ, Arron BL, et al. Economic Impact of  
594 COVID-19 Pandemic on Health Care Facilities and Systems: International Perspectives. *Best Practice*  
595 *& Research Clinical Anaesthesiology*. 2020.
- 596 23. Liverman CT, Goldfrank LR. *Preparing for an influenza pandemic: Personal protective*  
597 *equipment for healthcare Workers*: National Academies Press; 2007.
- 598 24. Stichler JF. Patient Safety: A Priority for Healthcare and for Healthcare Design. *HERD: Health*  
599 *Environments Research & Design Journal*. 2016;9(4):10-5.
- 600 25. Hoerke K, Djellouli N, Andrews L, Lewis-Jackson S, Manby L, Martin S, et al. Frontline  
601 healthcare workers' experiences with personal protective equipment during the COVID-19 pandemic  
602 in the UK: a rapid qualitative appraisal. *BMJ open*. 2021;11(1):e046199.
- 603 26. Ananda-Rajah M, Veness B, Berkovic D, Parker C, Kelly G, Ayton D. Hearing the voices of  
604 Australian healthcare workers during the COVID-19 pandemic. *medRxiv*. 2020.
- 605 27. Greenberg N, Docherty M, Gnanapragasam S, Wessely S. Managing mental health challenges  
606 faced by healthcare workers during covid-19 pandemic. *Bmj*. 2020;368:m1211.
- 607 28. Clinical Excellence Commission. *COVID-19 Infection Prevention and Control Guidance for*  
608 *Visiting Patients in Healthcare Facilities NSW Government*; 2020.
- 609 29. Nassar Junior AP, Besen BAMP, Robinson CC, Falavigna M, Teixeira C, Rosa RG. Flexible  
610 Versus Restrictive Visiting Policies in ICUs: A Systematic Review and Meta-Analysis\*. *Critical Care*  
611 *Medicine*. 2018;46(7):1175-80.
- 612 30. Wee LE, Conceicao EP, Sim JX-Y, Aung MK, Venkatachalam I. The impact of visitor restrictions  
613 on health care-associated respiratory viral infections during the COVID-19 pandemic: Experience of a  
614 tertiary hospital in Singapore. *American Journal of Infection Control*. 2021;49(1):134.
- 615 31. Corley A, Hammond NE, Fraser JF. The experiences of health care workers employed in an  
616 Australian intensive care unit during the H1N1 Influenza pandemic of 2009: a phenomenological  
617 study. *International journal of nursing studies*. 2010;47(5):577-85.
- 618 32. Vindrola-Padros C, Andrews L, Dowrick A, Djellouli N, Fillmore H, Gonzalez EB, et al.  
619 Perceptions and experiences of healthcare workers during the COVID-19 pandemic in the UK. *BMJ*  
620 *open*. 2020;10(11):e040503.
- 621 33. *Hospitals After COVID-19: How Do We Design For An Uncertain Future?* 2020 [Available  
622 from: [https://www.wsp.com/en-GL/insights/hospitals-after-covid-19-how-do-we-design-for-an-](https://www.wsp.com/en-GL/insights/hospitals-after-covid-19-how-do-we-design-for-an-uncertain-future)  
623 [uncertain-future](https://www.wsp.com/en-GL/insights/hospitals-after-covid-19-how-do-we-design-for-an-uncertain-future).
- 624 34. WSP William Sale Partnership. *Hospitals After COVID-19: How do we design for an uncertain*  
625 *future? Insights* [Internet]. 2020 March 2021]. Available from: [https://www.wsp.com/en-](https://www.wsp.com/en-GL/insights/hospitals-after-covid-19-how-do-we-design-for-an-uncertain-future)  
626 [GL/insights/hospitals-after-covid-19-how-do-we-design-for-an-uncertain-future](https://www.wsp.com/en-GL/insights/hospitals-after-covid-19-how-do-we-design-for-an-uncertain-future).
- 627 35. Timmis K, Brüssow H. The COVID-19 pandemic: some lessons learned about crisis  
628 preparedness and management, and the need for international benchmarking to reduce deficits.  
629 *Environmental microbiology*. 2020.
- 630 36. Kim Y. Nurses' experiences of care for patients with Middle East respiratory syndrome-  
631 coronavirus in South Korea. *American Journal of Infection Control*. 2018;46(7):781-7.
- 632 37. Ives J, Greenfield S, Parry JM, Draper H, Gratus C, Petts JI, et al. Healthcare workers'  
633 attitudes to working during pandemic influenza: a qualitative study. *BMC Public Health*. 2009;9:56-.

- 634 38. Fernandez R, Lord H, Halcomb E, Moxham L, Middleton R, Alananzeh I, et al. Implications for  
635 COVID-19: a systematic review of nurses' experiences of working in acute care hospital settings  
636 during a respiratory pandemic. *International Journal of Nursing Studies*. 2020;103637.
- 637 39. Denis JL, Côté N, Fleury C, Currie G, Spyridonidis D. Global health and innovation: A  
638 panoramic view on health human resources in the COVID-19 pandemic context. *The International*  
639 *Journal of Health Planning and Management*. 2021;36(S1):58-70.
- 640 40. Moreno C, Wykes T, Galderisi S, Nordentoft M, Crossley N, Jones N, et al. How mental health  
641 care should change as a consequence of the COVID-19 pandemic. *The Lancet Psychiatry*. 2020.
- 642 41. Ge X-Y, Li J-L, Yang X-L, Chmura AA, Zhu G, Epstein JH, et al. Isolation and characterization of  
643 a bat SARS-like coronavirus that uses the ACE2 receptor. *Nature*. 2013;503(7477):535-8.
- 644 42. Menachery VD, Yount BL, Debbink K, Agnihothram S, Gralinski LE, Plante JA, et al. A SARS-  
645 like cluster of circulating bat coronaviruses shows potential for human emergence. *Nature medicine*.  
646 2015;21(12):1508-13.
- 647 43. Osterholm MT. Preparing for the next pandemic. *N Engl J Med*. 2005;352(18):1839-42.
- 648 44. Tan BYQ, Chew NWS, Lee GKH, Jing M, Goh Y, Yeo LLL, et al. Psychological Impact of the  
649 COVID-19 Pandemic on Health Care Workers in Singapore. *Ann Intern Med*. 2020;173(4):317-20.
- 650 45. Rahimi F, Talebi Bezmin Abadi A. Transparency and information sharing could help abate the  
651 COVID-19 pandemic. *Infection Control & Hospital Epidemiology*. 2020;41(11):1366-7.
- 652 46. Jacobsen KH, Vraga EK. Improving communication about COVID-19 and emerging infectious  
653 diseases. *European journal of clinical investigation*. 2020;50(5):e13225.
- 654 47. Bourgeault IL, Maier CB, Dieleman M, Ball J, MacKenzie A, Nancarrow S, et al. The COVID-19  
655 pandemic presents an opportunity to develop more sustainable health workforces. *Human*  
656 *Resources for Health*. 2020;18(1):1-8.
- 657 48. Gomersall CD, Loo S, Joynt GM, Taylor BL. Pandemic preparedness. *Current Opinion in*  
658 *Critical Care*. 2007;13(6):742-7.
- 659 49. Kain T, Fowler R. Preparing intensive care for the next pandemic influenza. *Critical Care*.  
660 2019;23(1):337.
- 661 50. Australian Government Department of Health. Advice for people at risk of coronavirus  
662 (COVID-19) 2020 [Available from: [https://www.health.gov.au/news/health-alerts/novel-coronavirus-](https://www.health.gov.au/news/health-alerts/novel-coronavirus-2019-ncov-health-alert/advice-for-people-at-risk-of-coronavirus-covid-19)  
663 [2019-ncov-health-alert/advice-for-people-at-risk-of-coronavirus-covid-19](https://www.health.gov.au/news/health-alerts/novel-coronavirus-2019-ncov-health-alert/advice-for-people-at-risk-of-coronavirus-covid-19)].
- 664 51. Vyas L, Butakhieo N. The impact of working from home during COVID-19 on work and life  
665 domains: an exploratory study on Hong Kong. *Policy Design and Practice*. 2020:1-18.
- 666 52. Shore JH, Schneck CD, Mishkind MC. Telepsychiatry and the Coronavirus Disease 2019  
667 Pandemic—Current and Future Outcomes of the Rapid Virtualization of Psychiatric Care. *JAMA*  
668 *Psychiatry*. 2020;77(12):1211-2.
- 669 53. Smith AC, Thomas E, Snoswell CL, Haydon H, Mehrotra A, Clemensen J, et al. Telehealth for  
670 global emergencies: Implications for coronavirus disease 2019 (COVID-19). *Journal of telemedicine*  
671 *and telecare*. 2020;26(5):309-13.
- 672 54. Kichloo A, Albosta M, Dettloff K, Wani F, El-Amir Z, Singh J, et al. Telemedicine, the current  
673 COVID-19 pandemic and the future: a narrative review and perspectives moving forward in the USA.  
674 *Family medicine and community health*. 2020;8(3).
- 675 55. Collins JH. The benefits and limitations of telecommuting. *Defense AR Journal*.  
676 2009;16(1):55.
- 677 56. Delanoëije J, Verbruggen M. Between-person and within-person effects of telework: a quasi-  
678 field experiment. *European Journal of Work and Organizational Psychology*. 2020;29(6):795-808.

679
